# Supplementary material for: MRI measurement of the effects of moderate and deep neuromuscular blockade on the abdominal working space during laparoscopic surgery, a clinical study
Source: Springer Nature journal article supplement (doi:10.1186/s12871-023-02201-1), 2023-07-14

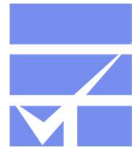

# CONSORT

TRANSPARENT REPORTING of TRIALS

## CONSORT 2010 Flow Diagram

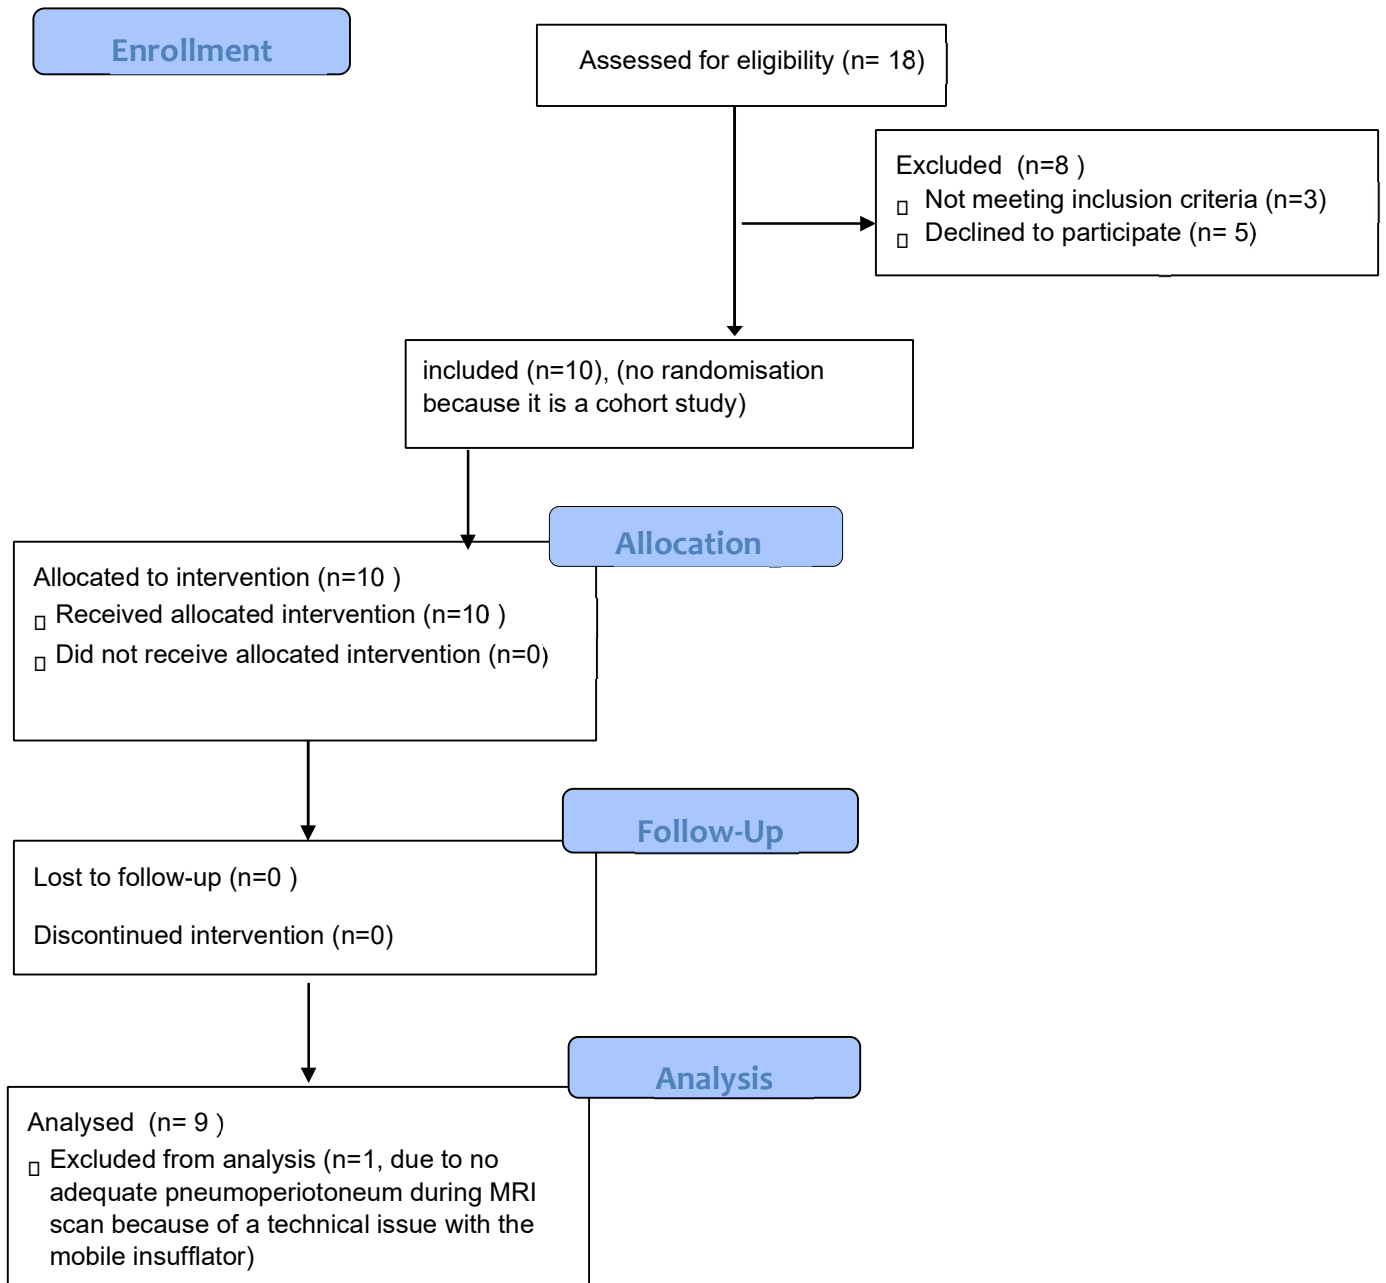

Supplement: MOESM1 [file 25787892]
